# Supplementary material for: Associations of Residential Long-Term Air Pollution Exposures and Satellite-Derived Greenness with Insulin Resistance in German Adolescents
Source: PubMed Central journal article supplement (PMC4977044; doi:10.1289/ehp.1509967), 2016-02-05
Supplement: ehp.1509967.s001.acco.pdf [file ehp.1509967.s001.acco.pdf]

**Note to readers with disabilities:** *EHP* strives to ensure that all journal content is accessible to all readers. However, some figures and Supplemental Material published in *EHP* articles may not conform to [508 standards](#) due to the complexity of the information being presented. If you need assistance accessing journal content, please contact [ehp508@niehs.nih.gov](mailto:ehp508@niehs.nih.gov). Our staff will work with you to assess and meet your accessibility needs within 3 working days.

## **Supplemental Material**

# **Associations of Residential Long-Term Air Pollution Exposures and Satellite-Derived Greenness with Insulin Resistance in German Adolescents**

Elisabeth Thiering, Iana Markevych, Irene Brüske, Elaine Fuentes, Jürgen Kratzsch, Dorothea Sugiri, Barbara Hoffmann, Andrea von Berg, Carl-Peter Bauer, Sibylle Koletzko, Dietrich Berdel, and Joachim Heinrich

### **Table of Contents**

**Table S1.** Associations of air pollution exposure (annual average concentrations) and NDVI (based on data from 2003) with HOMA-IR including additional adjustment for other exposure variables. Results of generalized additive models fitted separately for each exposure.

**Table S2.** Associations of air pollution exposure (annual average concentrations) and NDVI (based on data from 2003) with HOMA-IR including additional adjustment for short term (7-day average) air pollution concentrations. Results of generalized additive models fitted separately for each exposure.

**Table S3.** Associations of air pollution exposure (annual average concentrations) and NDVI (based on data from 2003) with HOMA-IR restricted to participants who have not moved since birth (n=414). Results of generalized additive models fitted separately for each exposure.

**Figure S1.** Flow chart of the study population

**Figure S2.** Smoother plots showing the linear association between air pollutants (annual average concentrations) and NDVI (based on data from 2003) and insulin resistance. Gam models adjusted for city, cohort, sex, age, BMI.

**Figure S3.** Comparable effect estimates in both cities. Gam models adjusted for cohort, sex, age, BMI, smoking by the adolescent, paternal and maternal education level, secondhand smoke in the home, physical activity, pubertal state, city-specific equivalent net income tertiles.

**Figure S4.** Gam models stratified for physical activity level adjusted for cohort, city, sex, age, BMI, smoking by the adolescent, paternal and maternal education level, secondhand smoke in the home, pubertal state, city-specific equivalent net income tertiles.

**Figure S5.** Gam models stratified for sex-specific BMI tertiles adjusted for cohort, city, sex, age, smoking by the adolescent, paternal and maternal education level, secondhand smoke in the home, pubertal state, physical activity, city-specific equivalent net income tertiles.

**Table S1.** Associations of air pollution exposure (annual average concentrations) and NDVI (based on data from 2003) with HOMA-IR including additional adjustment for other exposure variables. Results of generalized additive models fitted separately for each exposure.

| Exposure <sup>a</sup>                            | % difference (95% CI)     | p            |
|--------------------------------------------------|---------------------------|--------------|
| <b>Further adjusted model<sup>b</sup></b>        |                           |              |
| NDVI (500m)                                      | -5.5 (-11.3, 0.8)         | 0.084        |
| NDVI (1000m)                                     | <b>-7.4 (-13.3, -1.1)</b> | <b>0.023</b> |
| NO <sub>2</sub>                                  | <b>11.4 (4.4, 18.9)</b>   | <b>0.001</b> |
| PM <sub>10</sub>                                 | <b>11.4 (0.4, 23.7)</b>   | <b>0.042</b> |
| PM <sub>2.5</sub>                                | 14.6 (-2.5, 34.6)         | 0.099        |
| PM <sub>2.5</sub> abs.                           | 4.7 (-4.2, 14.3)          | 0.313        |
| <b>Plus adjustment for NDVI (500m)</b>           |                           |              |
| NDVI (500m)                                      |                           |              |
| NDVI (1000m)                                     | -12.2 (-24.6, 2.3)        | 0.094        |
| NO <sub>2</sub>                                  | <b>10.8 (3.0, 19.3)</b>   | <b>0.007</b> |
| PM <sub>10</sub>                                 | 8.8 (-3.0, 22.1)          | 0.151        |
| PM <sub>2.5</sub>                                | 11.0 (-6.2, 31.3)         | 0.226        |
| PM <sub>2.5</sub> abs.                           | 2.5 (-6.5, 12.3)          | 0.603        |
| <b>Plus adjustment for PM<sub>10</sub></b>       |                           |              |
| NDVI (500m)                                      | -3.5 (-10.0, 3.5)         | 0.319        |
| NDVI (1000m)                                     | -5.8 (-12.4, 1.4)         | 0.112        |
| NO <sub>2</sub>                                  | <b>11.3 (2.5, 20.8)</b>   | <b>0.011</b> |
| PM <sub>10</sub>                                 |                           |              |
| PM <sub>2.5</sub>                                | 6.9 (-11.6, 29.3)         | 0.491        |
| PM <sub>2.5</sub> abs.                           | -3.0 (-13.7, 9.0)         | 0.610        |
| <b>Plus adjustment for PM<sub>2.5</sub></b>      |                           |              |
| NDVI (500m)                                      | -4.4 (-10.6, 2.1)         | 0.181        |
| NDVI (1000m)                                     | -6.5 (-12.7, 0.1)         | 0.056        |
| NO <sub>2</sub>                                  | <b>10.5 (3.0, 18.5)</b>   | <b>0.005</b> |
| PM <sub>10</sub>                                 | 9.0 (-3.6, 23.4)          | 0.171        |
| PM <sub>2.5</sub>                                |                           |              |
| PM <sub>2.5</sub> abs.                           | -0.1 (-10.3, 11.3)        | 0.986        |
| <b>Plus adjustment for PM<sub>2.5</sub> abs.</b> |                           |              |
| NDVI (500m)                                      | -5.2 (-11.3, 1.3)         | 0.114        |
| NDVI (1000m)                                     |                           |              |
| NO <sub>2</sub>                                  | <b>-7.3 (-13.5, -0.6)</b> | <b>0.032</b> |
| PM <sub>10</sub>                                 | <b>13.8 (5.4, 22.9)</b>   | <b>0.001</b> |
| PM <sub>2.5</sub>                                | 14.7 (-0.3, 31.9)         | 0.054        |
| PM <sub>2.5</sub> abs.                           | 16.2 (-4.9, 41.9)         | 0.142        |

<sup>a</sup> estimates per 2SD increase in the exposure variables: 0.2 NDVI units NDVI (500m) and (1000m) 0.2 NDVI units, 8.9 µg/m<sup>3</sup> NO<sub>2</sub>, 6.7 µg/m<sup>3</sup> PM<sub>10</sub>, 4.4 µg/m<sup>3</sup> PM<sub>2.5</sub>, and 0.5 10<sup>-5</sup>/m PM<sub>2.5</sub> abs.

<sup>b</sup> adjusted for: study area, cohort, sex, age, BMI, smoking by the adolescent, maternal and paternal education levels, second hand smoke at home, physical activity, income, pubertal scale

**Table S2.** Associations of air pollution exposure (annual average concentrations) and NDVI (based on data from 2003) with HOMA-IR including additional adjustment for short term (7-day average) air pollution concentrations. Results of generalized additive models fitted separately for each exposure.

| <b>Exposure<sup>a</sup></b>                               | <b>% difference<br/>(95% CI)</b> | <b>p</b>      |
|-----------------------------------------------------------|----------------------------------|---------------|
| <b>Further adjusted model<sup>b</sup></b>                 |                                  |               |
| NDVI (500m)                                               | -5.5 (-11.3, 0.8)                | 0.084         |
| NDVI (1000m)                                              | <b>-7.4 (-13.3, -1.1)</b>        | <b>0.023</b>  |
| NO <sub>2</sub>                                           | <b>11.4 (4.4, 18.9)</b>          | <b>0.001</b>  |
| PM <sub>10</sub>                                          | <b>11.4 (0.4, 23.7)</b>          | <b>0.042</b>  |
| PM <sub>2.5</sub>                                         | 14.6 (-2.5, 34.6)                | 0.099         |
| PM <sub>2.5</sub> abs.                                    | 4.7 (-4.2, 14.3)                 | 0.313         |
| <b>Plus adjustment for 7-day average NO<sub>2</sub></b>   |                                  |               |
| NDVI (500m)                                               | -5.7 (-11.6, 0.5)                | 0.071         |
| NDVI (1000m)                                              | <b>-7.6 (-13.6, -1.3)</b>        | <b>0.0198</b> |
| NO <sub>2</sub>                                           | <b>11.7 (4.7, 19.3)</b>          | <b>0.0009</b> |
| PM <sub>10</sub>                                          | <b>12.1 (0.9, 24.5)</b>          | <b>0.033</b>  |
| PM <sub>2.5</sub>                                         | 15.5 (-1.8, 35.8)                | 0.081         |
| PM <sub>2.5</sub> abs.                                    | 5.5 (-3.6, 15.4)                 | 0.243         |
| <b>Plus adjustment for 7-day average PM<sub>10</sub></b>  |                                  |               |
| NDVI (500m)                                               | -5.4 (-11.3, 0.8)                | 0.085         |
| NDVI (1000m)                                              | <b>-7.4 (-13.3, -1.1)</b>        | <b>0.023</b>  |
| NO <sub>2</sub>                                           | <b>11.2 (4.2, 18.6)</b>          | <b>0.0013</b> |
| PM <sub>10</sub>                                          | <b>11.7 (0.7, 24.0)</b>          | <b>0.036</b>  |
| PM <sub>2.5</sub>                                         | 15.4 (-1.7, 35.5)                | 0.080         |
| PM <sub>2.5</sub> abs.                                    | 6.3 (-2.9, 16.3)                 | 0.186         |
| <b>Plus adjustment for 7-day average PM<sub>2.5</sub></b> |                                  |               |
| NDVI (500m)                                               | -5.4 (-11.2, 0.8)                | 0.087         |
| NDVI (1000m)                                              | <b>-7.4 (-13.3, -1.0)</b>        | <b>0.024</b>  |
| NO <sub>2</sub>                                           | <b>11.3 (4.3, 18.7)</b>          | <b>0.0012</b> |
| PM <sub>10</sub>                                          | <b>11.7 (0.7, 24.0)</b>          | <b>0.036</b>  |
| PM <sub>2.5</sub>                                         | 15.5 (-1.6, 35.6)                | 0.079         |
| PM <sub>2.5</sub> abs.                                    | 6.3 (-2.9, 16.3)                 | 0.185         |

<sup>a</sup> estimates per 2SD increase in the exposure variables: 0.2 NDVI units NDVI (500m) and (1000m) 0.2 NDVI units, 8.9 µg/m<sup>3</sup> NO<sub>2</sub>, 6.7 µg/m<sup>3</sup> PM<sub>10</sub>, 4.4 µg/m<sup>3</sup> PM<sub>2.5</sub>, and 0.5 10<sup>-5</sup>/m PM<sub>2.5</sub> abs.

<sup>b</sup> adjusted for: study area, cohort, sex, age, BMI, smoking by the adolescent, maternal and paternal education levels, second hand smoke at home, physical activity, income, pubertal scale

**Table S3.** Associations of air pollution exposure (annual average concentrations) and NDVI (based on data from 2003) with HOMA-IR restricted to participants who have not moved since birth (n=414). Results of generalized additive models fitted separately for each exposure.

| <b>Exposure<sup>a</sup></b>               | <b>% difference (95% CI)</b> | <b>p</b>     |
|-------------------------------------------|------------------------------|--------------|
| <b>Basic model<sup>b</sup></b>            |                              |              |
| NDVI (500m)                               | -3.1 (-11.4, 6.0)            | 0.492        |
| NDVI (1000m)                              | -5.8 (-14.3, 3.5)            | 0.217        |
| NO <sub>2</sub>                           | <b>10.6 (0.9, 21.4)</b>      | <b>0.033</b> |
| PM <sub>10</sub>                          | 12.2 (-4.6, 31.9)            | 0.166        |
| PM <sub>2.5</sub>                         | 14.2 (-10.1, 45.1)           | 0.275        |
| PM <sub>2.5</sub> abs.                    | 8.1 (-5.4, 23.6)             | 0.252        |
| <b>Further adjusted model<sup>c</sup></b> |                              |              |
| NDVI (500m)                               | -4.0 (-12.3, 5.2)            | 0.385        |
| NDVI (1000m)                              | -6.5 (-15.1, 3.0)            | 0.176        |
| NO <sub>2</sub>                           | <b>12.2 (2.1, 23.3)</b>      | <b>0.017</b> |
| PM <sub>10</sub>                          | 13.2 (-4.1, 33.6)            | 0.143        |
| PM <sub>2.5</sub>                         | 17.6 (-7.8, 49.9)            | 0.192        |
| PM <sub>2.5</sub> abs.                    | 10.2 (-3.8, 26.2)            | 0.161        |
| <b>Plus adjustment for NO<sub>2</sub></b> |                              |              |
| NDVI (500m)                               | 1.8 (-8.2, 12.9)             | 0.730        |
| NDVI (1000m)                              | -1.4 (-11.8, 10.3)           | 0.804        |
| NO <sub>2</sub>                           |                              |              |
| PM <sub>10</sub>                          | 1.2 (-18.3, 25.3)            | 0.913        |
| PM <sub>2.5</sub>                         | 8.6 (-17.3, 42.6)            | 0.556        |
| PM <sub>2.5</sub> abs.                    | 0.5 (-15.1, 19.0)            | 0.953        |
| <b>Plus adjustment for NDVI (1000m)</b>   |                              |              |
| NDVI (500m)                               | 10.0 (-10.3, 34.9)           | 0.360        |
| NDVI (1000m)                              | -6.5 (-15.1, 3.0)            | 0.176        |
| NO <sub>2</sub>                           | 11.4 (-0.1, 24.2)            | 0.052        |
| PM <sub>10</sub>                          | 9.0 (-10.1, 32.2)            | 0.379        |
| PM <sub>2.5</sub>                         | 12.1 (-13.6, 45.5)           | 0.392        |
| PM <sub>2.5</sub> abs.                    | 7.0 (-8.0, 24.6)             | 0.381        |

<sup>a</sup> estimates per 2SD increase in the exposure variables: 0.2 NDVI units NDVI (500m) and (1000m) 0.2 NDVI units, 8.9 µg/m<sup>3</sup> NO<sub>2</sub>, 6.7 µg/m<sup>3</sup> PM<sub>10</sub>, 4.4 µg/m<sup>3</sup> PM<sub>2.5</sub>, and 0.5 10-5/m PM<sub>2.5</sub> abs.

<sup>b</sup> adjusted for: study area, cohort, sex, age, BMI

<sup>c</sup> adjusted for: study area, cohort, sex, age, BMI, smoking by the adolescent, maternal and paternal education levels, second hand smoke at home, physical activity, income, pubertal scale

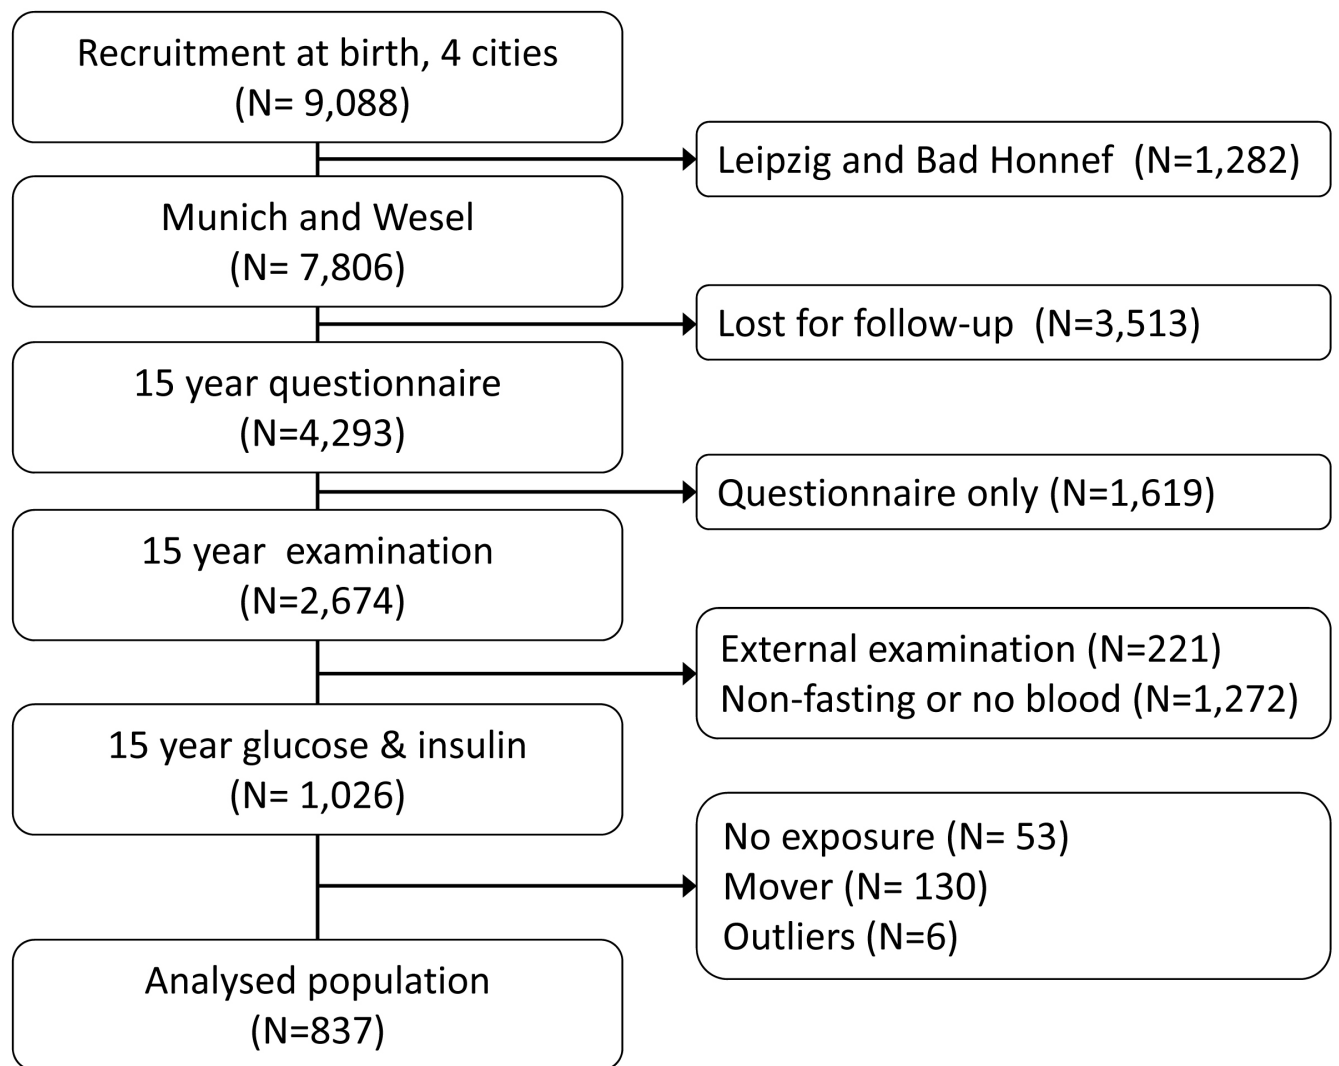

**Figure S1.** Flow chart of the study population

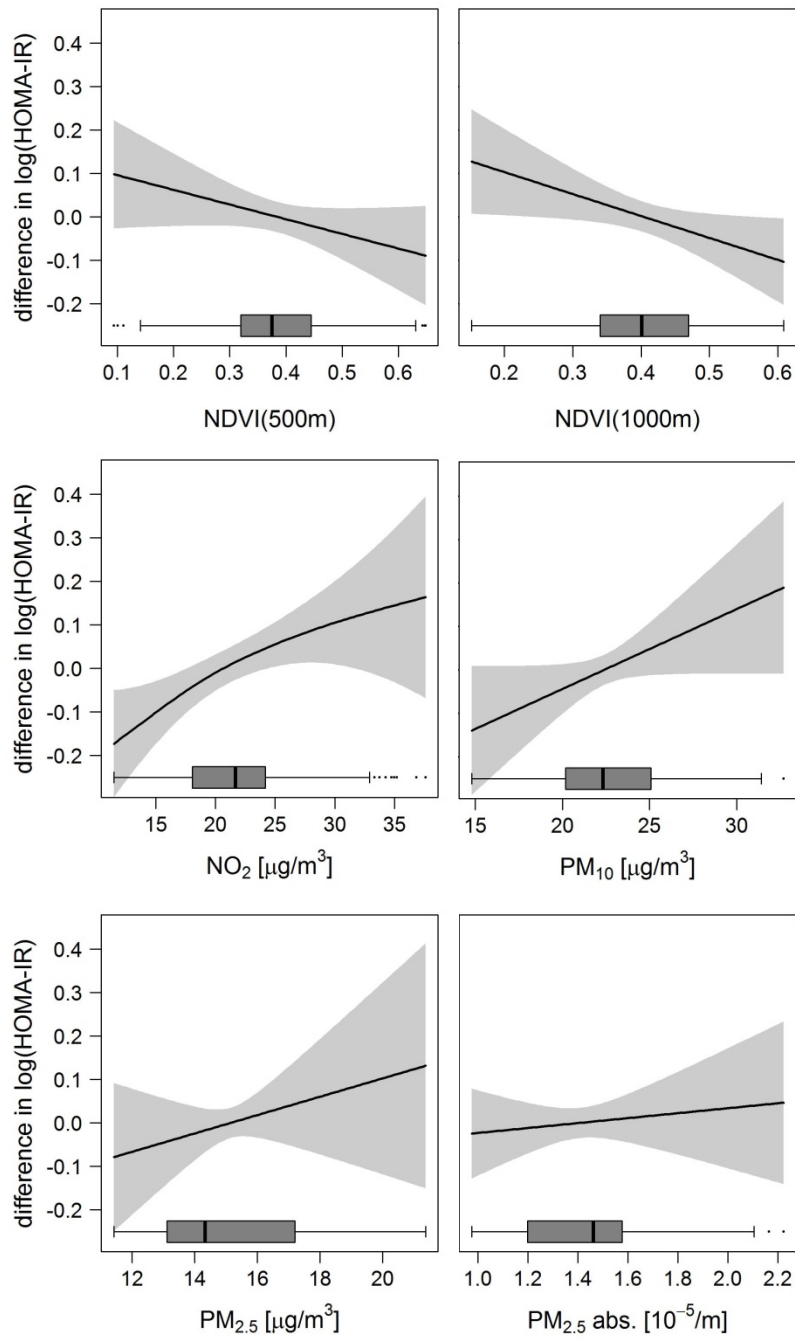

**Figure S2.** Smoother plots showing the linear association between air pollutants (annual average concentrations) and NDVI (based on data from 2003) and insulin resistance. Gam models adjusted for city, cohort, sex, age, BMI.

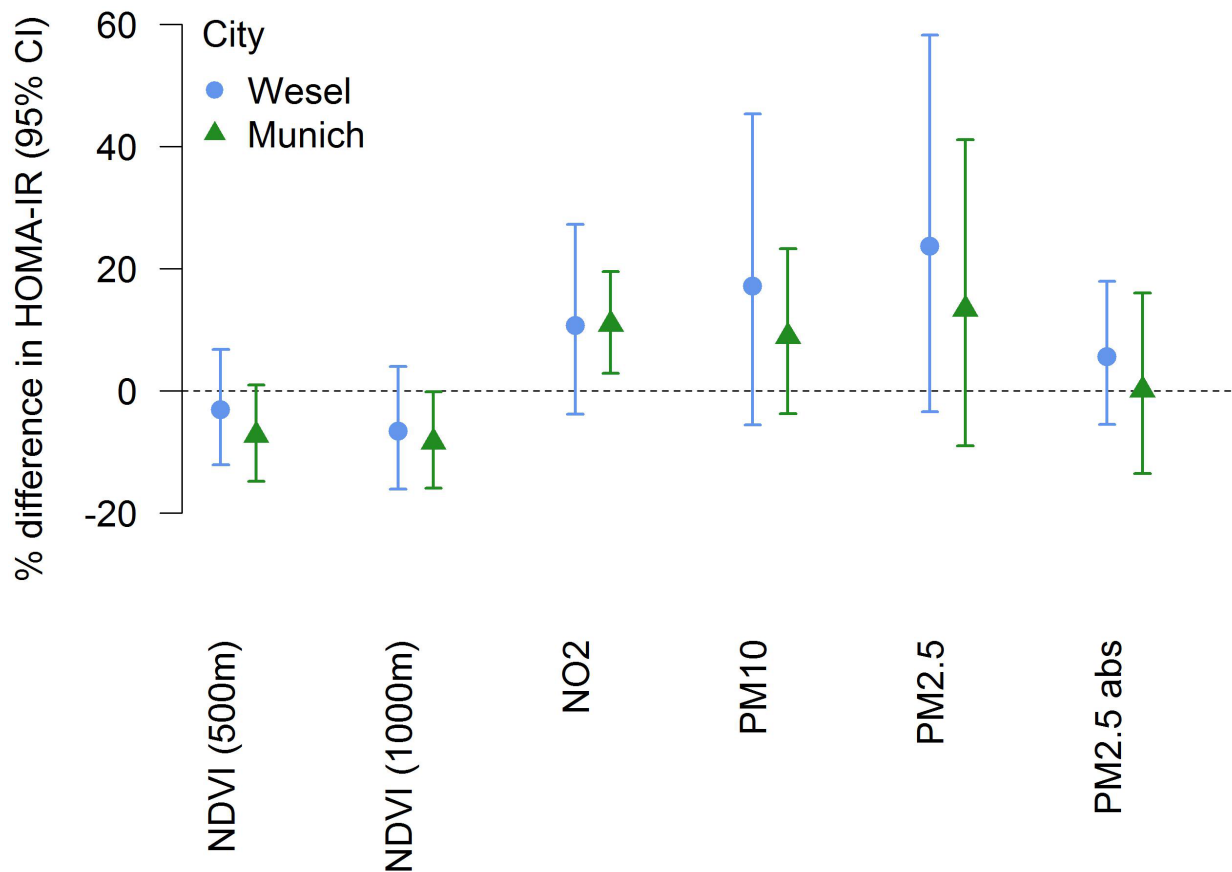

**Figure S3.** Comparable effect estimates in both cities. Gam models adjusted for cohort, sex, age, BMI, smoking by the adolescent, paternal and maternal education level, secondhand smoke in the home, physical activity, pubertal state, city-specific equivalent net income tertiles. P-values for the interaction with study area: NDVI (500m):  $p=0.241$ , NDVI (1000m):  $p=0.475$ , NO<sub>2</sub>:  $p=0.3077$ , PM<sub>10</sub>:  $p=0.655$ , PM<sub>2.5</sub>:  $p=0.718$ , PM<sub>2.5</sub> abs.:  $p=0.816$ .



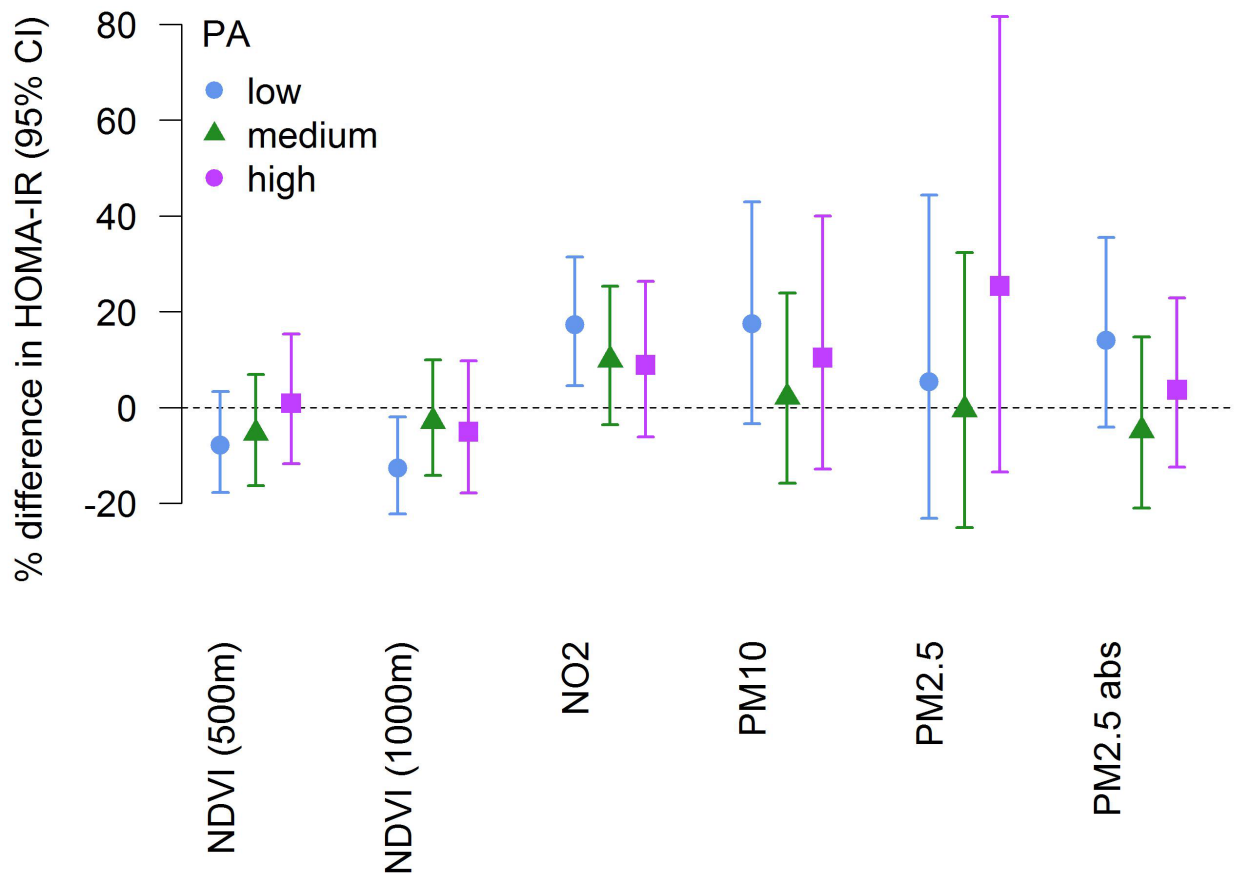

**Figure S4.** Gam models stratified for physical activity level adjusted for cohort, city, sex, age, BMI, smoking by the adolescent, paternal and maternal education level, secondhand smoke in the home, pubertal state, city-specific equivalent net income tertiles. P-values for the interaction with physical activity: NDVI (500m):  $p=0.933$ , NDVI (1000m):  $p=0.966$ ,  $\text{NO}_2$ :  $p=0.378$ ,  $\text{PM}_{10}$ :  $p=0.433$ ,  $\text{PM}_{2.5}$ :  $p=0.474$ ,  $\text{PM}_{2.5}$  abs.:  $p=0.926$ .

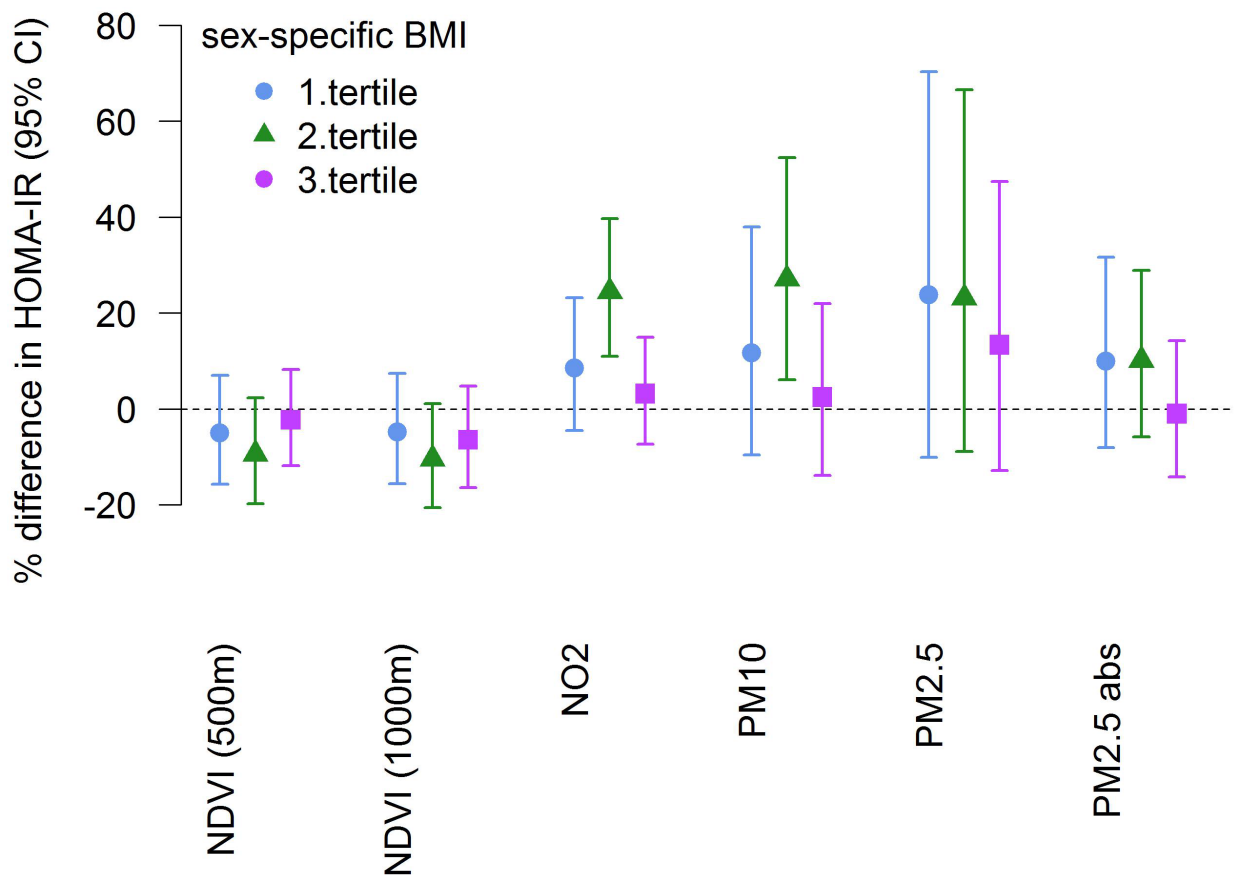

**Figure S5.** Gam models stratified for sex-specific BMI tertiles adjusted for cohort, city, sex, age, smoking by the adolescent, paternal and maternal education level, secondhand smoke in the home, pubertal state, physical activity, city-specific equivalent net income tertiles. P-values for the interaction with BMI: NDVI (500m):  $p=0.432$ , NDVI (1000m):  $p=0.668$ ,  $\text{NO}_2$ :  $p=0.788$ ,  $\text{PM}_{10}$ :  $p=0.630$ ,  $\text{PM}_{2.5}$ :  $p=0.585$ ,  $\text{PM}_{2.5}$  abs.:  $p=0.107$ .
